# Supplementary material
Source: PubMed Central journal article supplement (PMC8338847)
Supplement: NIHMS1688763-supplement-1.pdf [file NIHMS1688763-supplement-1.pdf]

## SUPPLEMENTARY TABLES AND TABLE LEGENDS

**Table S1.** Differential expression matrix utilized in single-cell RNA sequencing data analysis to identify cell clusters, Related to Figure 1.

**Table S2.** Differential expression of genes between ccRCC tumor cluster and normal epithelium cluster, Related to Figure 1.

**Table S3.** List of oligonucleotides used for qPCR.

| Gene           | Forward primer            | Reverse primer           |
|----------------|---------------------------|--------------------------|
| ACAD9          | TCGGAGATGGGTTTAAGGTG      | CGTAAGCCTTCTGAGCCATC     |
| ACOT7          | CCGAAAACATCCTCACAGGT      | GTTCTCCACTTGGTCTCCA      |
| APOE           | GGTCGCTTTTGGGATTACCT      | TCCAGTTCCGATTTGTAGGC     |
| $\beta$ -Actin | CATGTACGTTGCTATCCAGG      | CTCCTTAATGTCACGCACGAT    |
| CPT1A          | GAAGATGGCAGAAGCTCACC      | TGGCGTACATCGTTGTCAT      |
| DBI            | TGGCCACTACAAACAAGCAA      | TGGCACAGTAACCAAATCCA     |
| EPAS1          | GACATGAAGTTCACCTACTGTGATG | CGGAGTCTAGCGCATGGTA      |
| FABP7          | CCAGCTGGGAGAAGAGTTTG      | CTCATAGTGGCGAACAGCAA     |
| HIF1a          | CAGCTATTTGCGTGTGAGGA      | TTCATCTGTGCTTTTCATGTCATC |
| IGFBP3         | CAGAGACTCGAGCACAGCAC      | GATGACCGGGGTTTAAAGGT     |
| LOX            | GGACTGAGAAAGGGGAAAGG      | GGACGTGGCTCACAGAAAAT     |
| PLIN4          | CAGATGCAGGAAGCATCAAA      | GCGACTAAAAGGCACTCTGG     |
| RARRES2        | GTGCAAAGTCAGGCCCAATG      | TTGGGTCTCTATGGGGCAGT     |
| RORC           | CAGTGAGAGCCCAGAAGGAC      | TCATCCCATCCATTTTTGGT     |
| SMPD3          | GAGGGCTGCATCTCTACCAG      | ACCCTGTGAAGTGAGGGTTG     |
| VEGFA          | TCCTCACACCATTGAAACCA      | GATCCTGCCCTGTCTCTCTG     |

**Table S4.** List of recombinant DNAs.

| TRCN Name      | Name in Manuscript | Gene Name |
|----------------|--------------------|-----------|
| TRCN0000063443 | shRARRES2-1        | RARRES2   |
| TRCN0000373361 | shRARRES2-2        | RARRES2   |
| TRCN0000373359 | shRARRES2-3        | RARRES2   |
| TRCN0000003803 | shHIF2 $\alpha$    | EPAS1     |

| siGENOME SMARTpool siRNA | Gene Name | Target Sequence     |
|--------------------------|-----------|---------------------|
| M-021441-01              | KLF6      | GCCUAGAGCUGGAACGUUA |
| M-021441-02              | KLF6      | GCAGGAAAGUUUACACCAA |
| M-021441-03              | KLF6      | UGCAAGAAGUGAUGAGUUA |
| M-021441-04              | KLF6      | AAAUUGAGCUCCUCUGUCA |

12

13 **Table S5. List of noncoding guide RNAs for CRISPR-Cas9.**

| Gene number | Sequence                          |
|-------------|-----------------------------------|
| RARRES2 A1  | 5'-CACCGGACCAGTGTGGAGAGCGCCG-3'   |
| RARRES2 A2  | 5'-AAACCGGCGCTCTCCACACTGGTCC-3'   |
| RARRES2 B1  | 5'-CACCG GCGACGGCTGCTGATCCCTC-3'  |
| RARRES2 B2  | 5'-AAACGAGGGATCAGCAGCCGTCGCC-3'   |
| RARRES2 C1  | 5'-CACCG CTATGGGGCAGTGGACCAAC-3'  |
| RARRES2 C2  | 5'-AAACGTTGGTCCACTGCCCCATAGC-3'   |
| RARRES2 D1  | 5'-CACCG CCAGTGCTGGCTTAGCTGCG-3'  |
| RARRES2 D2  | 5'- AAACCGCAGCTAAGCCAGCACTGGC-3'  |
| RARRES2 E1  | 5'-CACCG CCCTTCTTACCCGCAGAACT-3'  |
| RARRES2 E2  | 5'-AAACAGTTCTGCGGGTAAGAAGGGC-3'   |
| RARRES2 F1  | 5'- CACCG ATTGGGCCTGACTTTGCACT-3' |
| RARRES2 F2  | 5'- AAACAGTGCAAAGTCAGGCCCAATC-3   |
| CMKLR1 F1   | 5'-CACCGGAACCACCGCAGCGTTTCGCC-3'  |
| CMKLR1 R1   | 5'-AAACGGCGAACGCTGCGGTGGTTCC-3'   |
| CMKLR1 F2   | 5'-CACCGCAAACCTGCAGCGCAACCGCC-3'  |
| CMKLR1 R2   | 5'-AAACGGCGGTTGCGCTGCAGTTTGC-3'   |
| CMKLR1 F3   | 5'-CACCGTGTGGGGTATAGCCGGCACA-3'   |
| CMKLR1 R3   | 5'-AAACTGTGCCGGCTATACCCACAC-3'    |
| CMKLR1 F4   | 5'-CACCGCCATATCACCTATGCCGCCA-3'   |
| CMKLR1 R4   | 5'-AAACTGGCGGCATAGGTGATATGGC-3'   |
| CMKLR1 F5   | 5'-CACCGGTATTCATCACCGTAACTGA-3'   |
| CMKLR1 R5   | 5'-AAACTCAGTTACGGTGATGAATACC-3'   |
| CMKLR1 F6   | 5'-CACCGGCGCTGCAGTTTGCACACGA-3'   |
| CMKLR1 R6   | 5'-AAACTCGTGTGCAAACCTGCAGCGCC-3'  |

14

15 **Table S6. List of antibodies.**

| Antibodies                                              | Source         | Catalog Number  |
|---------------------------------------------------------|----------------|-----------------|
| Rabbit anti-RARRES2 (IB)<br>(Polyclonal)                | Proteintech    | Cat# 10216-1-AP |
| Rabbit anti-EPAS                                        | Novus          | Cat# NB100-122  |
| Mouse ant- $\beta$ -Actin (Monoclonal)                  | Sigma-Aldrich  | Cat# A1987      |
| Mouse anti-NDUFA9 (Monoclonal)                          | Abcam          | Cat# ab14713    |
| Mouse anti-UQCRC2 (Monoclonal)                          | Abcam          | Cat# ab14745    |
| Mouse anti-COX1 (Monoclonal)                            | Abcam          | Cat# ab14705    |
| Rabbit anti-SDHA (Polyclonal)                           | Proteintech    | Cat# 14865-1-AP |
| Mouse anti-ATP5A (Monoclonal)                           | Abcam          | Cat# ab14748    |
| Rabbit anti-VHL (Polyclonal)                            | Cell signaling | Cat# 2738S      |
| Rabbit anti-p-Akt Ser473 (Polyclonal)                   | Cell signaling | Cat# 9271S      |
| Rabbit anti-p-Akt Thr308 (Polyclonal)                   | Cell signaling | Cat# 9275S      |
| Rabbit anti-Akt (Polyclonal)                            | Cell signaling | Cat# 9272S      |
| Rabbit anti-p-p44/42 MAPK<br>Thr202/Tyr204 (Polyclonal) | Cell signaling | Cat# 9101S      |

|                                               |                         |                  |
|-----------------------------------------------|-------------------------|------------------|
| Rabbit anti-p44/42 MAPK (Polyclonal)          | Cell signaling          | Cat# 9102S       |
| Mouse anti-KLF6, clone 12A.8.3 (Monoclonal)   | Millipore-Sigma         | Cat# MABN119     |
| Mouse anti-CMKLR1 (ChemR23, C-7) (Monoclonal) | Santa Cruz              | Cat# sc-374570   |
| Rabbit anti-RARRES2 (Polyclonal) (IHC)        | Phoenix Pharmaceuticals | Cat# H-002-52    |
| Mouse Gamma Globulin                          | Jackson Immuno Research | Cat# 015-000-002 |
| Anti-RARRES2 (Monoclonal)                     | BioXCell                | MMC-Rarres2-1H1  |

17 **SUPPLEMENTARY FIGURES AND FIGURE LEGENDS**

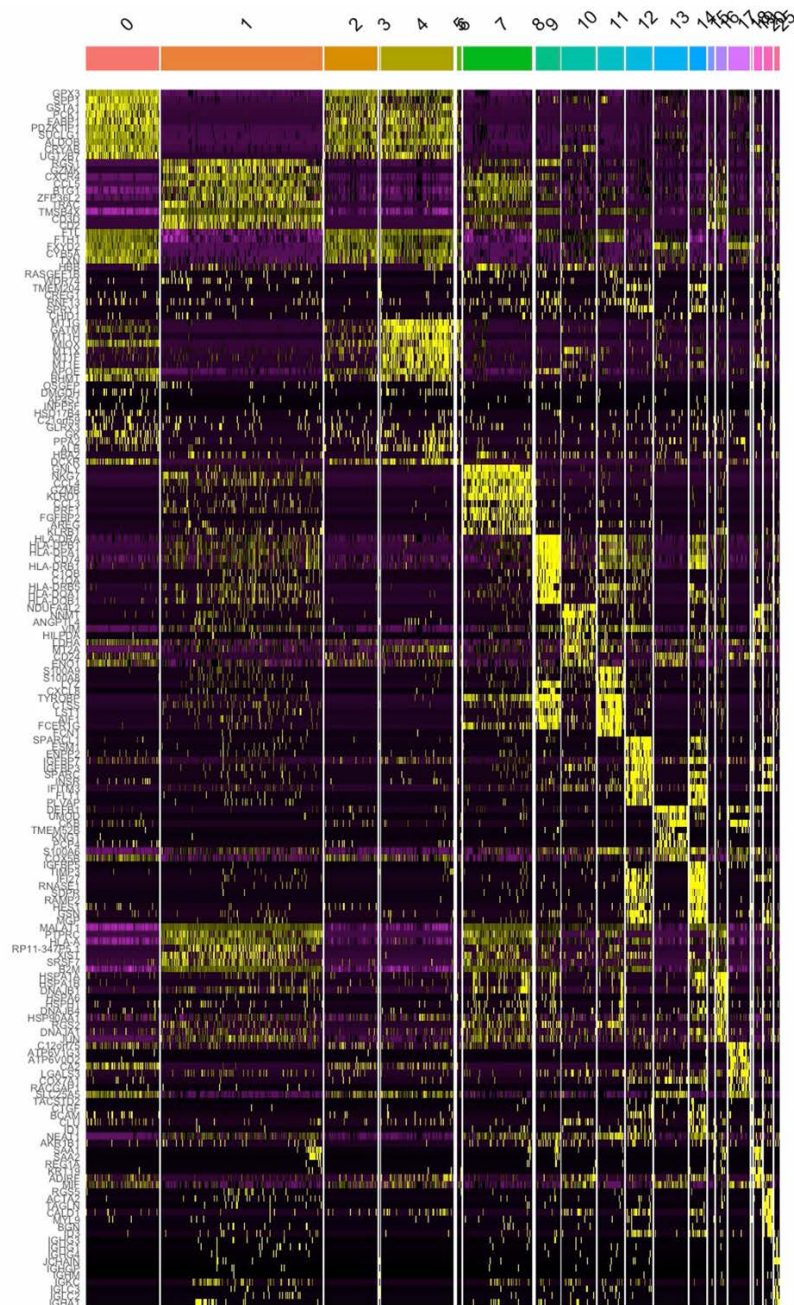

18

19 **Figure S1. Cells are classified into different cell clusters and display distinctive gene**

20 **signatures, Related to Figure 1.**

21 Heatmap displays the differentially expressed genes in each cluster of cell populations identified

22 from single-cell RNA-sequencing. The differentially expressed genes were utilized to identify cell

23 populations (Supplementary Table S1). Purple, low expression; yellow, high expression.

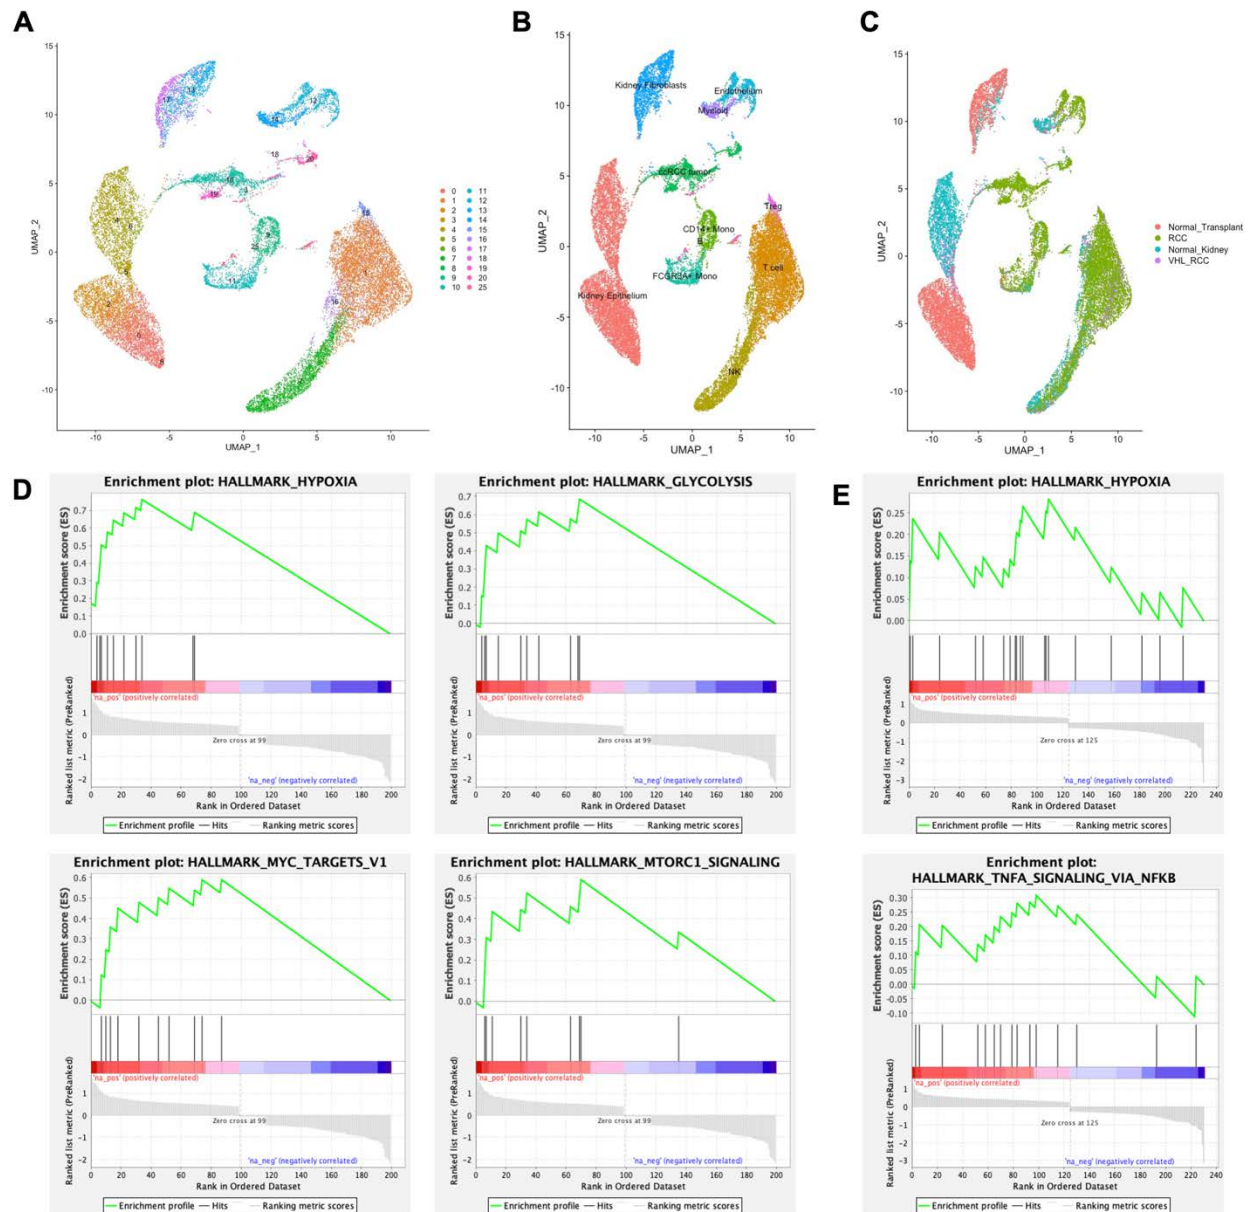

**Figure S2. ccRCC tumor cluster shows specific tumor gene signatures, as compared to other cell clusters, Related to Figure 1.**

(A) Uniform manifold approximation and projection (UMAP) includes all cells from normal transplant kidney, ccRCC tumors, normal adjacent kidney tissues and wild-type VHL ccRCC tumors. Tumors cluster annotations according to gene markers from scRNA-seq in Supplementary Figure S1.

- 31 (B) The same UMAP as in (A) with selected cell types annotated; the cell types were  
32 determined according to the expression level of the representative gene markers indicated  
33 in Supplementary Figure S1.
- 34 (C) The cluster annotations according to the tissue types.
- 35 (D) Gene set enrichment analysis verifies the upregulation of hypoxia, glycolysis, myc-targets  
36 and mTORC1 signaling related genes in ccRCC tumor clusters as compared to epithelium.  
37 Purple, low expression; red, high expression.
- 38 (E) Gene set enrichment analysis shows no significant correlation of hypoxia and NFkB  
39 related genes between two subclusters of ccRCC tumor cells. Purple, low expression; red,  
40 high expression.

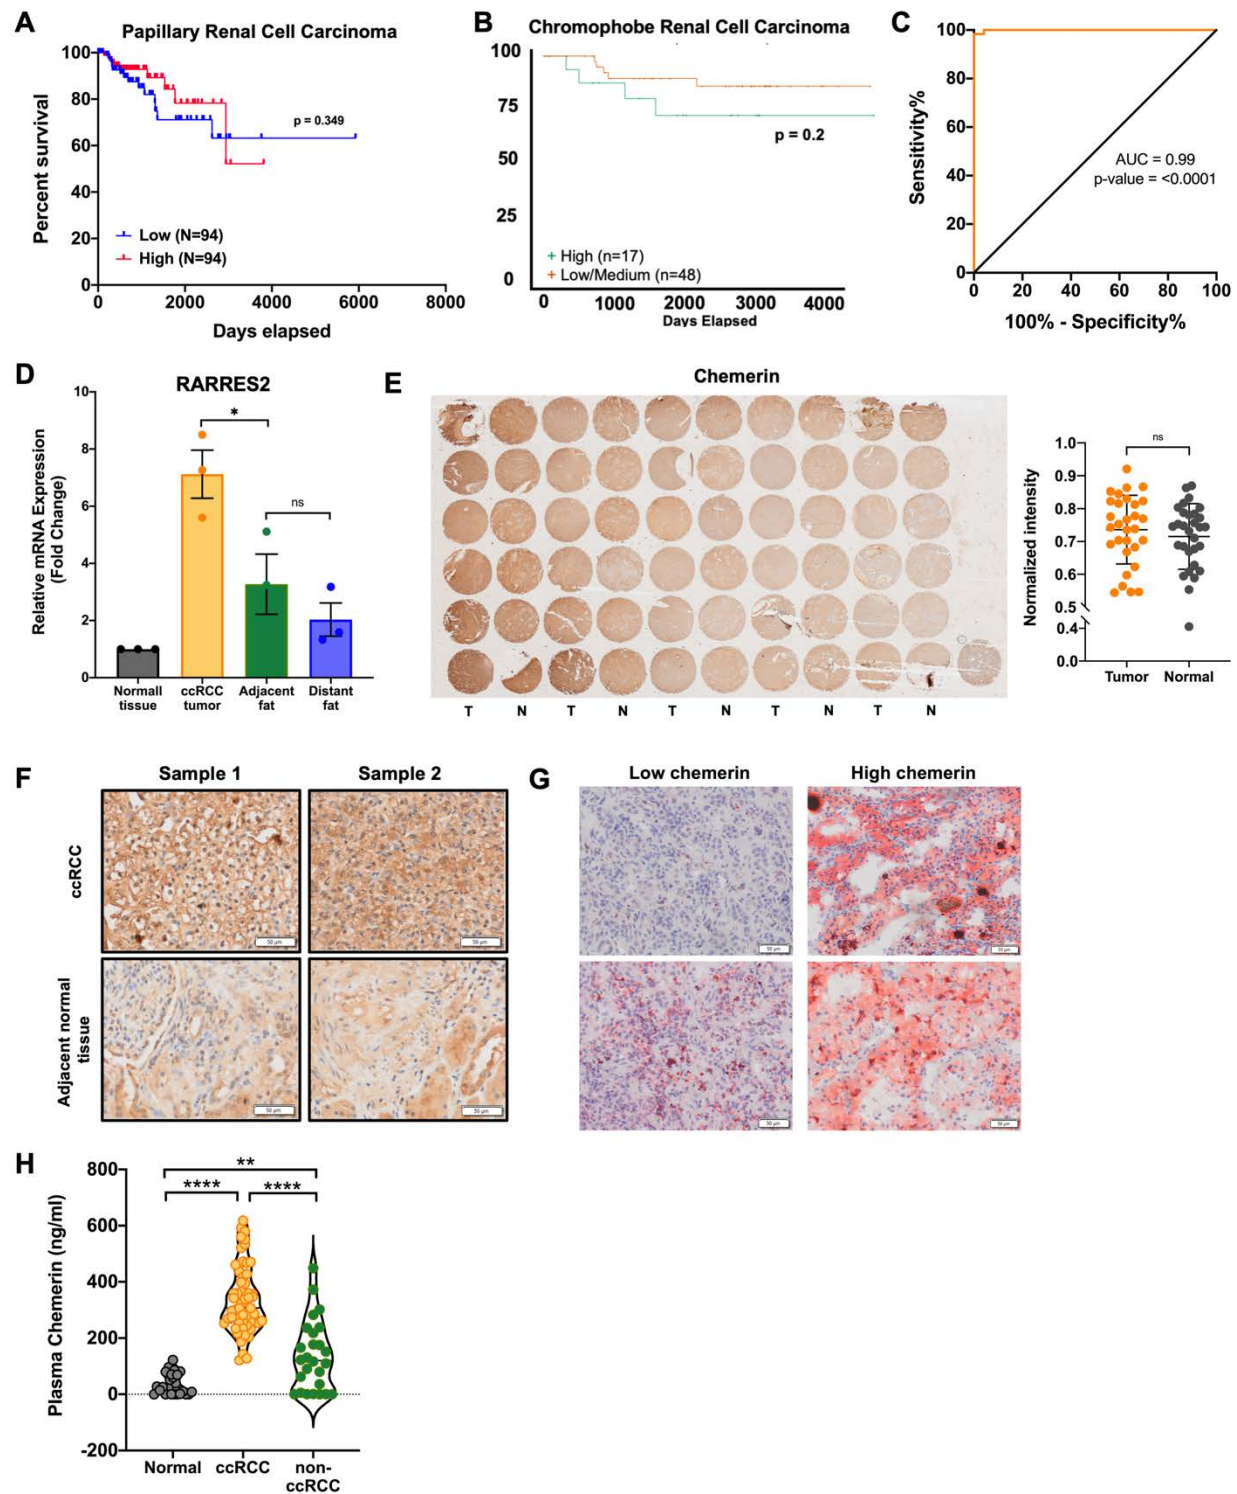

**Figure S3. Chemerin protein is detected in ccRCC tissue; and chemerin expression is not correlated with survival of patients with papillary renal cell carcinoma and chromophobe renal cell carcinoma, Related to Figure 1.**

45 (A) Kaplan-Meier curve showing no correlation of higher mRNA expression of chemerin with  
 46 survival of papillary renal cell carcinoma patients in the TCGA KIRP dataset using upper  
 47 and lower third cohorts. Log rank analysis.

48 (B) Kaplan-Meier curve showing no correlation of higher mRNA expression of chemerin with  
 49 survival of chromophobe renal cell carcinoma patients in the TCGA KICH dataset using  
 50 upper and lower third cohorts. Log rank analysis.

51 (C) ROC curve of plasma chemerin. Area under the curve is 0.99 with sensitivity of 98.31%  
 52 and specificity of 95.83% at the cut-off value of 121.6 ng/mL.

53 (D) Relative expression of chemerin in normal kidney tissue adjacent to ccRCC tumor, ccRCC  
 54 tumor tissue, fat tissue adjacent to the ccRCC tumor tissue, and fat tissue distant to the  
 55 ccRCC tumor tissue. Two-tailed student's t-test.

56 (E) Immunohistochemistry staining (IHC) of chemerin protein expression in a tumor  
 57 microarray containing 30 ccRCC tissues with matched cancer adjacent kidney tissue.  
 58 Each column represents different pairs of tumor (T) and normal (N) samples. Normalized  
 59 intensity of staining was quantified on the right.

60 (F) Representative 10× pictures of ccRCC and normal adjacent kidney tissues in IHC sections  
 61 in (E).

62 (G) Representative Oil-Red-O pictures of ccRCC with low and high expression of chemerin  
 63 (10×).

64 (H) Plasma chemerin concentration in normal healthy individuals (n=24), patients with ccRCC  
 65 tumor (n=59) and patients with papillary RCC (non-ccRCC) (n=26). Mann-Whitney U-test.  
 66 Error bars represent SD. \* $p < 0.05$ ; \*\* $p < 0.01$ ; \*\*\* $p < 0.001$ ; \*\*\*\*  $p < 0.0001$ .

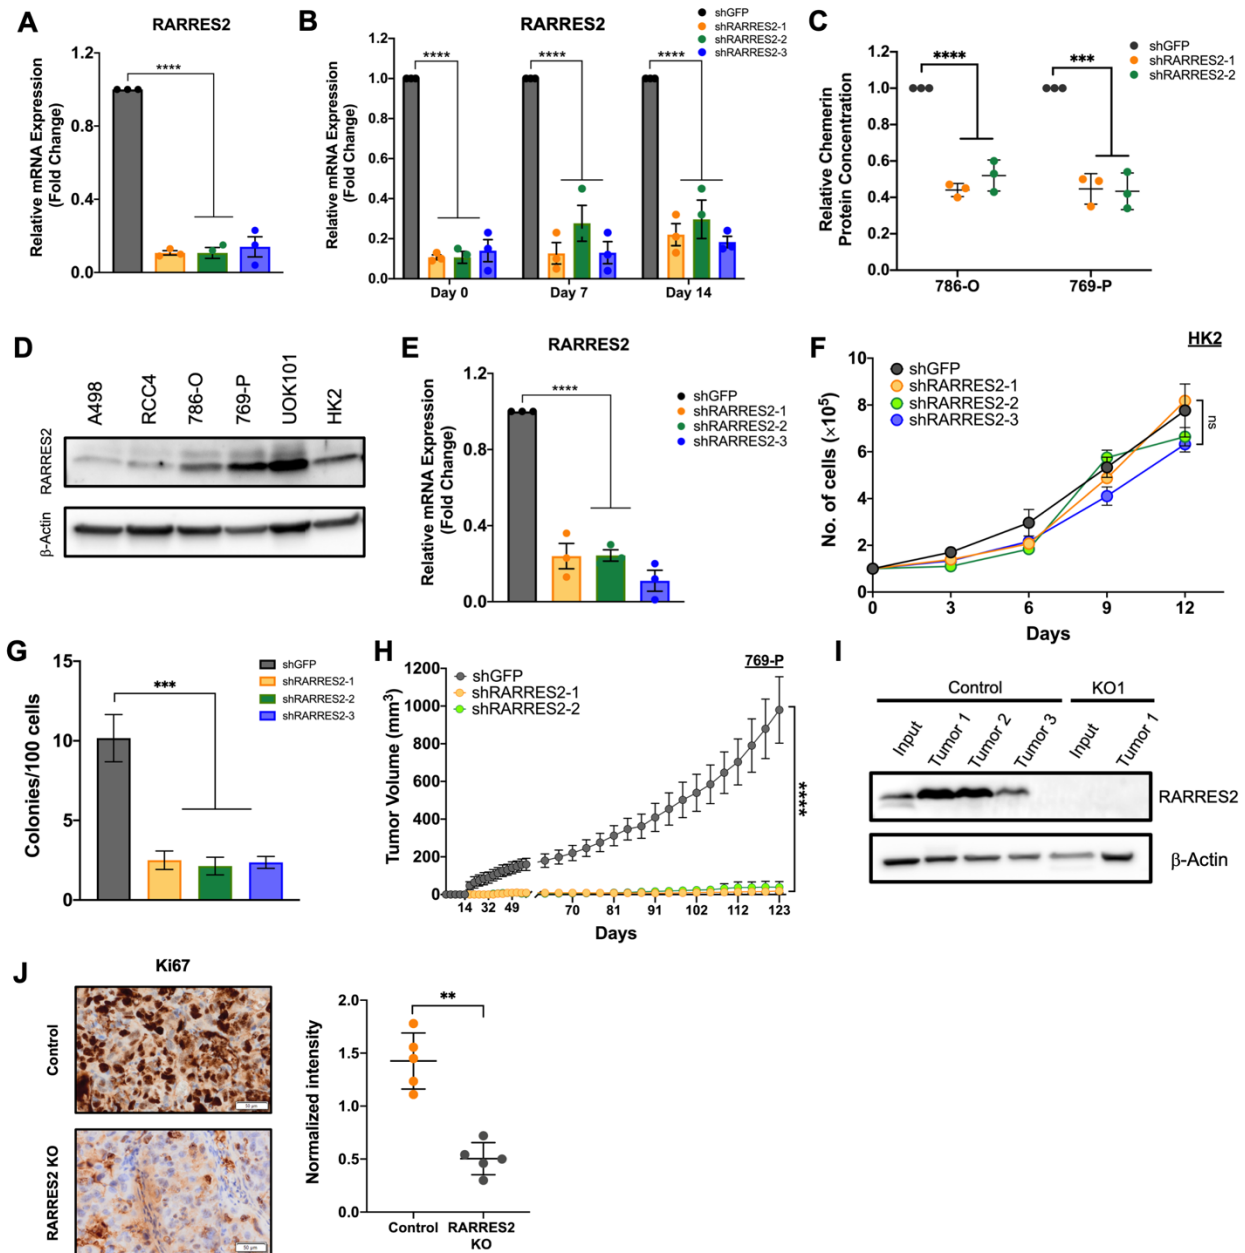

**Figure S4. Chemerin is functionally important for ccRCC growth, Related to Figure 2.**

- (A) Relative mRNA expression of chemerin in 786-O following knockdown with 3 independent, non-overlapping shRNAs targeting RARRES2 (shRARRES2-1, shRARRES2-2, shRARRES2-3) or control shGFP. One-way ANOVA.
- (B) Relative mRNA expression of chemerin in 786-O following knockdown with 3 independent, non-overlapping shRNAs targeting RARRES2 (shRARRES2-1, shRARRES2-2,

- shRARRES2-3) or control shGFP at Day 0, Day 7 and Day 14 post-infection. One-way ANOVA.
- (C) Relative chemerin protein concentration in media of 786-O and 769-O following knockdown with 3 independent, non-overlapping shRNAs targeting RARRES2 (shRARRES2-1, shRARRES2-2, shRARRES2-3) or control shGFP 72 hours post-infection. One-way ANOVA. Error bars represent SD.
- (D) Immunoblot of different ccRCC cell lines (A-498, RCC4, 786-O, 769-P, UOK101 and HK-2) demonstrating relative chemerin protein expression.
- (E) Relative mRNA expression of chemerin in HK-2 following knockdown with 3 independent, non-overlapping shRNAs targeting RARRES2 (shRARRES2-1, shRARRES2-2, shRARRES2-3) or control shGFP. One-way ANOVA.
- (F) Cell proliferation assay from HK-2 cells infected with shGFP control or 3 different shRNAs encoding lentivirus targeting chemerin (shRARRES2-1, shRARRES2-2, shRARRES2-3). Two-way repeated measures ANOVA with Geisser-Greenhouse correction.
- (G) Colony forming assay from 786-O cells infected with shGFP control or 3 different shRNAs encoding lentivirus targeting chemerin (shRARRES2-1, shRARRES2-2, shRARRES2-3), measured by number of colonies formed from initial 100 cells after 2 weeks. Two-way repeated measures ANOVA with Geisser-Greenhouse correction.
- (H) Subcutaneous tumor volume measurement in nude mice implanted with 769-P cells which were infected with lentivirus encoding either shGFP (n=8) or 2 different shRARRES2 (n=8 in each arm). Two-way measures ANOVA with Dunnett's multiple comparison test correction.
- (I) Immunoblot of subcutaneous tumors derived from sgCONT and sgRARRES2 from Fig. 2G demonstrating complete knockout of chemerin protein.

98 (J) Ki67 IHC of subcutaneous tumors derived from sgCONT and sgRARRES2 from Fig. 2G  
99 demonstrating reduced tumor cell proliferation *in vivo* (10×). Representative images were  
100 quantified and shown on the right.  
101 Error bars represent SEM of three independent experiments and three technical replica per  
102 experiment. \* $p < 0.05$ , \*\* $p < 0.01$ , \*\*\* $p < 0.001$ , \*\*\*\* $p < 0.0001$ .  
103

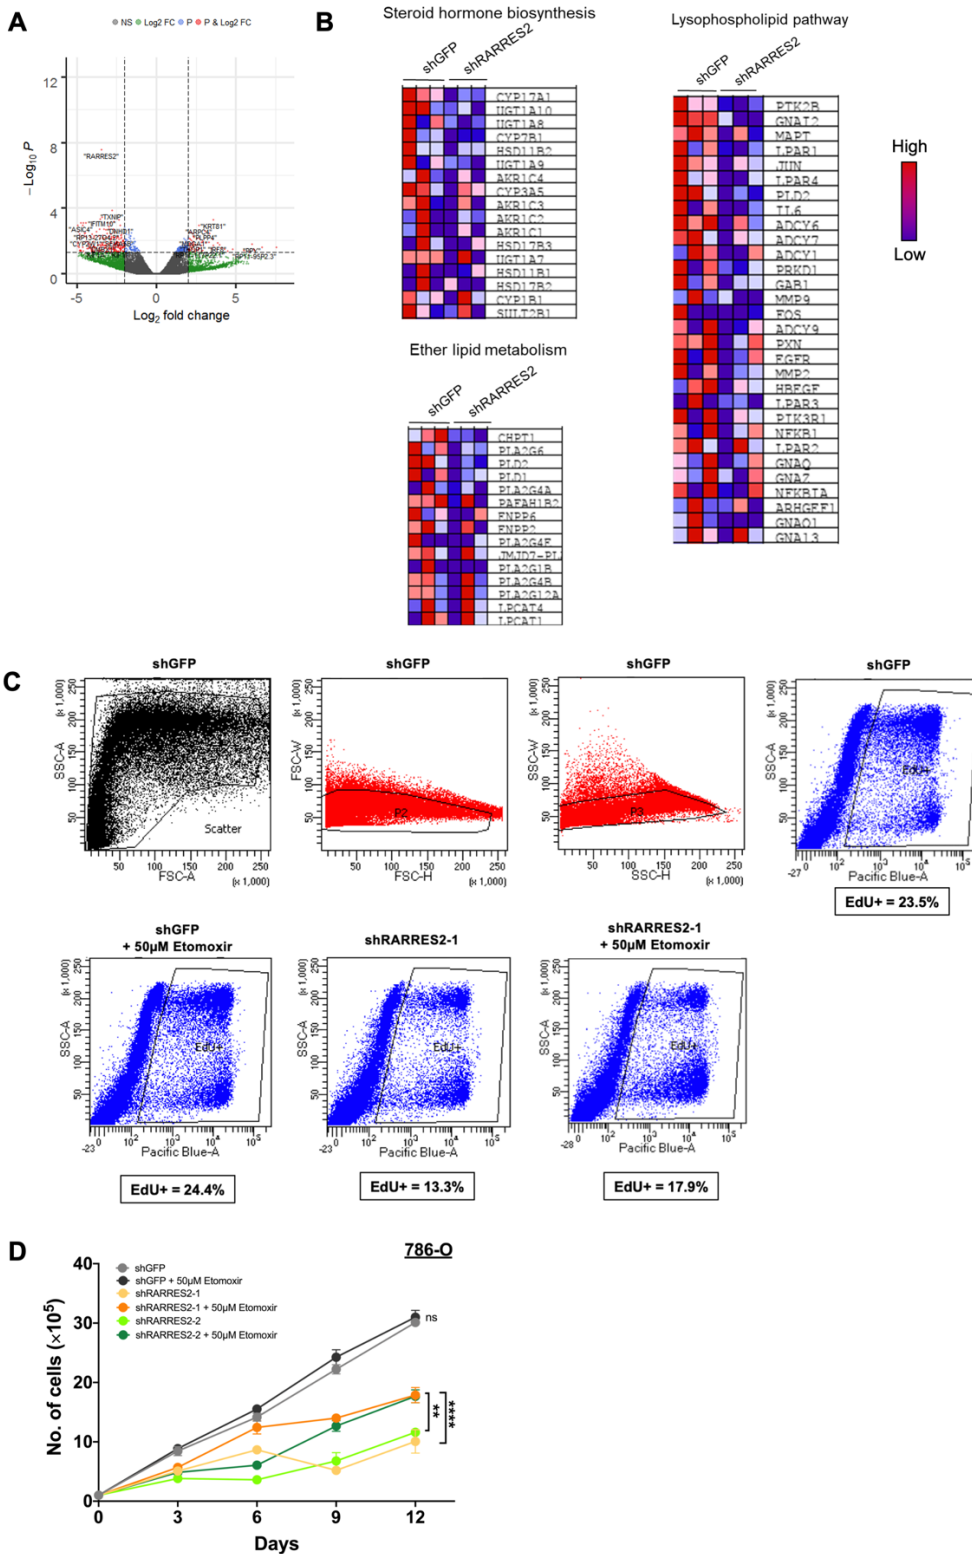

**Figure S5. Lipid metabolism pathways alteration in chemerin-deficient ccRCC, Related to Figure 3.**

107 (A) Volcano plot showing commonly differentially expressed genes in between 786-O cells  
108 infected with lentivirus encoding either shGFP control (n=3) or combined shRARRES2  
109 clones (n=8).

110 (B) Heatmaps showing the downregulated genes in chemerin-targeted versus control 786-O  
111 cells in different lipid metabolism pathways. Purple, low expression; red, high expression.

112 (C) Representative EdU flow cytometry plots for Fig. 3G.

113 (D) 50  $\mu$ M Etomoxir treatment rescues proliferation defect in chemerin-knockdown 786-O cells,  
114 measured by cell proliferation assay. Two-way repeated measures ANOVA with Geisser-  
115 Greenhouse correction.

116 Error bars represent SD. \* $p < 0.05$ , \*\* $p < 0.01$ , \*\*\* $p < 0.001$ , \*\*\*\* $p < 0.0001$ .

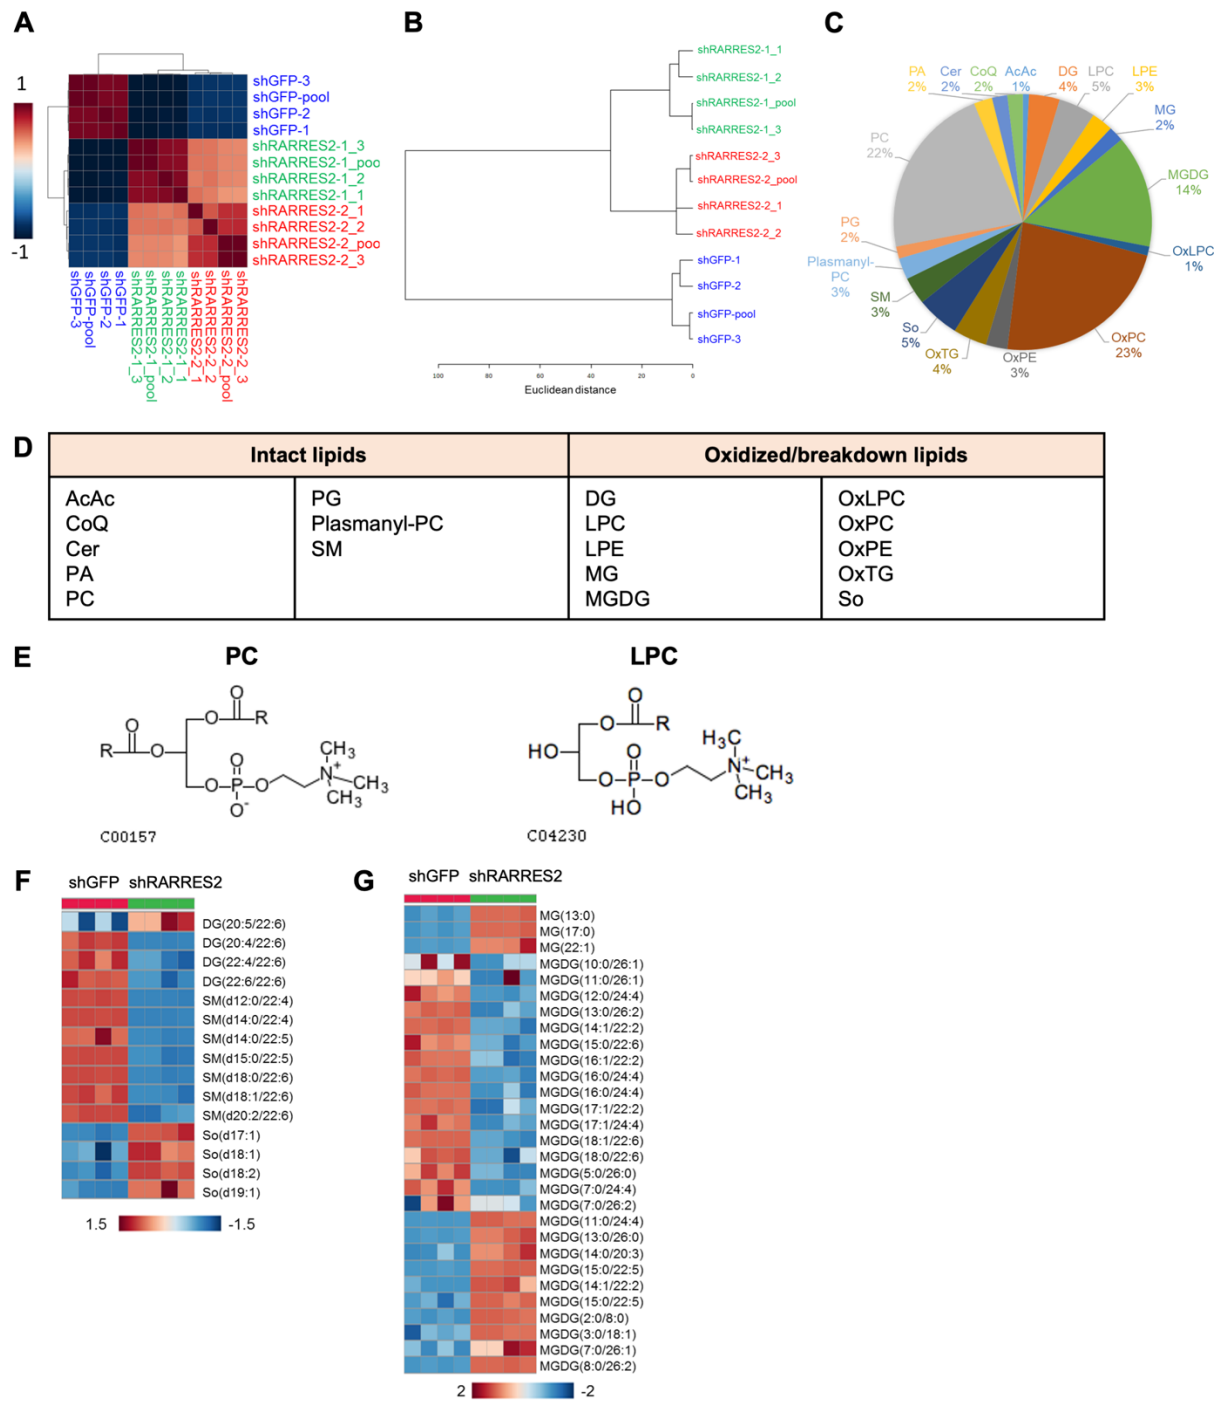

**Figure S6. Untargeted lipidomics profiling in 786-O with chemerin inhibition, Related to Figure 4.**

- 120 (A) Overview of lipid profiles between two independent clones of shRARRSE2 obtained  
121 through untargeted lipidomic analysis as annotated by the LipidMatch (guided in-source  
122 fragment annotation) algorithm.
- 123 (B) Clustering between control and two independent clones of shRARRSE2 obtained through  
124 untargeted lipidomic analysis as annotated by the LipidMatch (Based on MS/MS based  
125 confirmation) algorithm.
- 126 (C) Percentage of each lipid species identified in mass spectrometry analysis.
- 127 (D) The lipid species identified in intact and oxidized/breakdown lipid categories.
- 128 (E) Structure of phosphatidylcholine (PC) and lysophosphatidylcholine (LPC).
- 129 (F) Heatmap from untargeted lipidomics showing lower sphingomyelin species and increased  
130 breakdown product sphingosine in chemerin deficient cells. Blue, low expression; red, high  
131 expression. DG, diacylglycerols; SM, sphingomyelin; So, sphingosine.
- 132 (G) Heatmap from untargeted lipidomics showing reduction in glycerolipid  
133 monogalactosyldiacylglycerol (MGDG) in chemerin deficient cells. Blue, low expression;  
134 red, high expression. MG, monoglyceride; MGDG, monogalactosyldiacylglycerol.

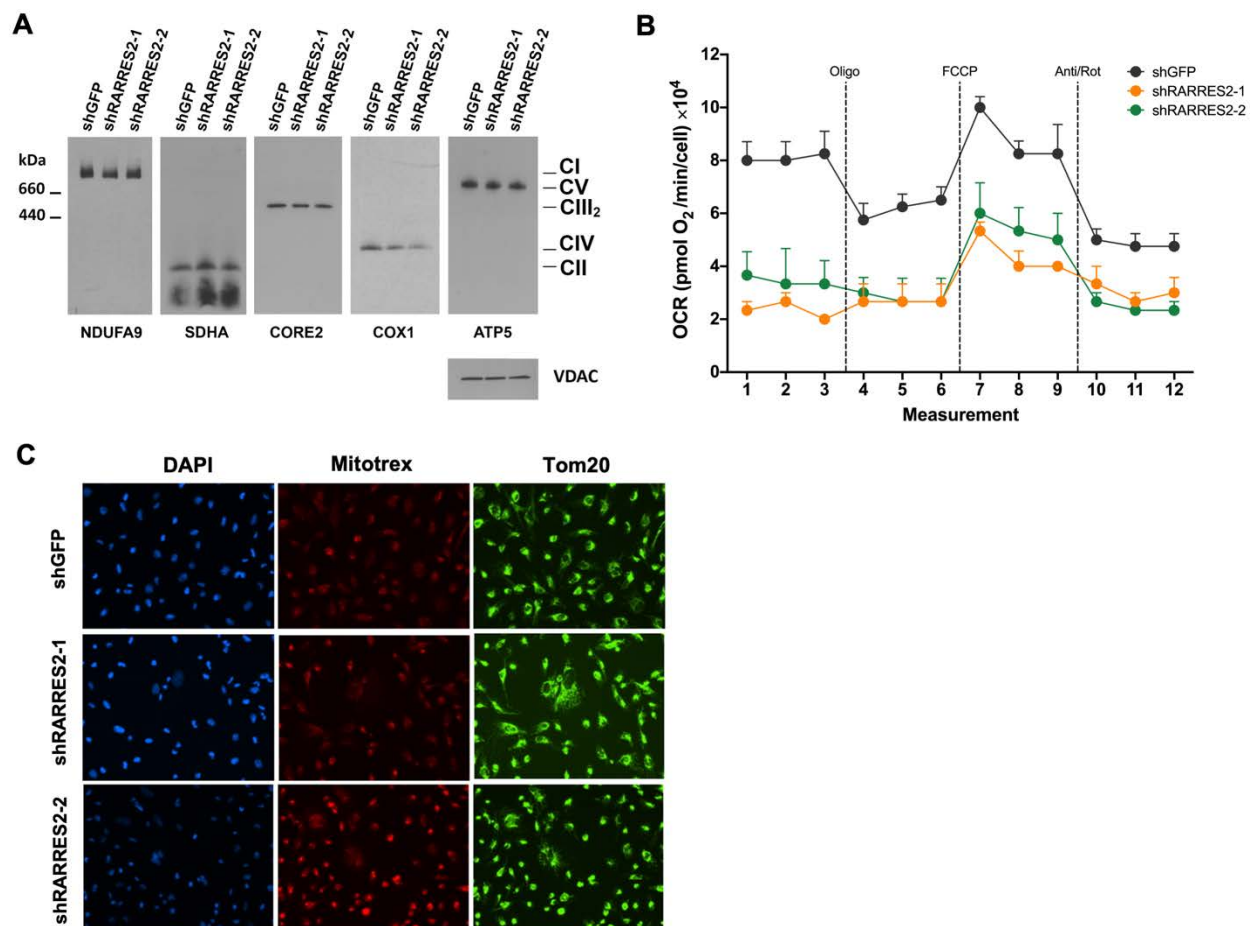

**Figure S7. Chemerin inhibition reduces mitochondrial OXPHOS complex IV but do not cause overall structural change to mitochondria, Related to Figure 5.**

(A) Steady-state levels of mitochondrial individual OXPHOS complex III subunit CORE2 and complex IV subunit COX1 in 786-O cells infected with lentivirus targeting shGFP or 2 different shRARRES2. This was evaluated by BN-PAGE analysis of whole cell extracts prepared in the presence of 1% lauryl maltoside (LM) and probed with antibodies. Four technical replicates were performed.

(B) Seahorse Cell Mito Stress Test in 786-O following knockdown with 2 independent, non-overlapping shRNAs targeting RARRES2 (shRARRES2-1, shRARRES2-2) or control shGFP. The oxygen consumption rate (OCR) in chemerin-silenced cell is lower than in the control cell.

147 (C) Confocal imaging of mitochondrial structure stained with Mitotrex and Tom20 in 786-O  
148 cells infected with lentivirus targeting shGFP or 2 different shRARRES2 (10×).  
149 Error bars represent SD. \* $p < 0.05$ , \*\* $p < 0.01$ , \*\*\* $p < 0.001$ , \*\*\*\* $p < 0.0001$ .

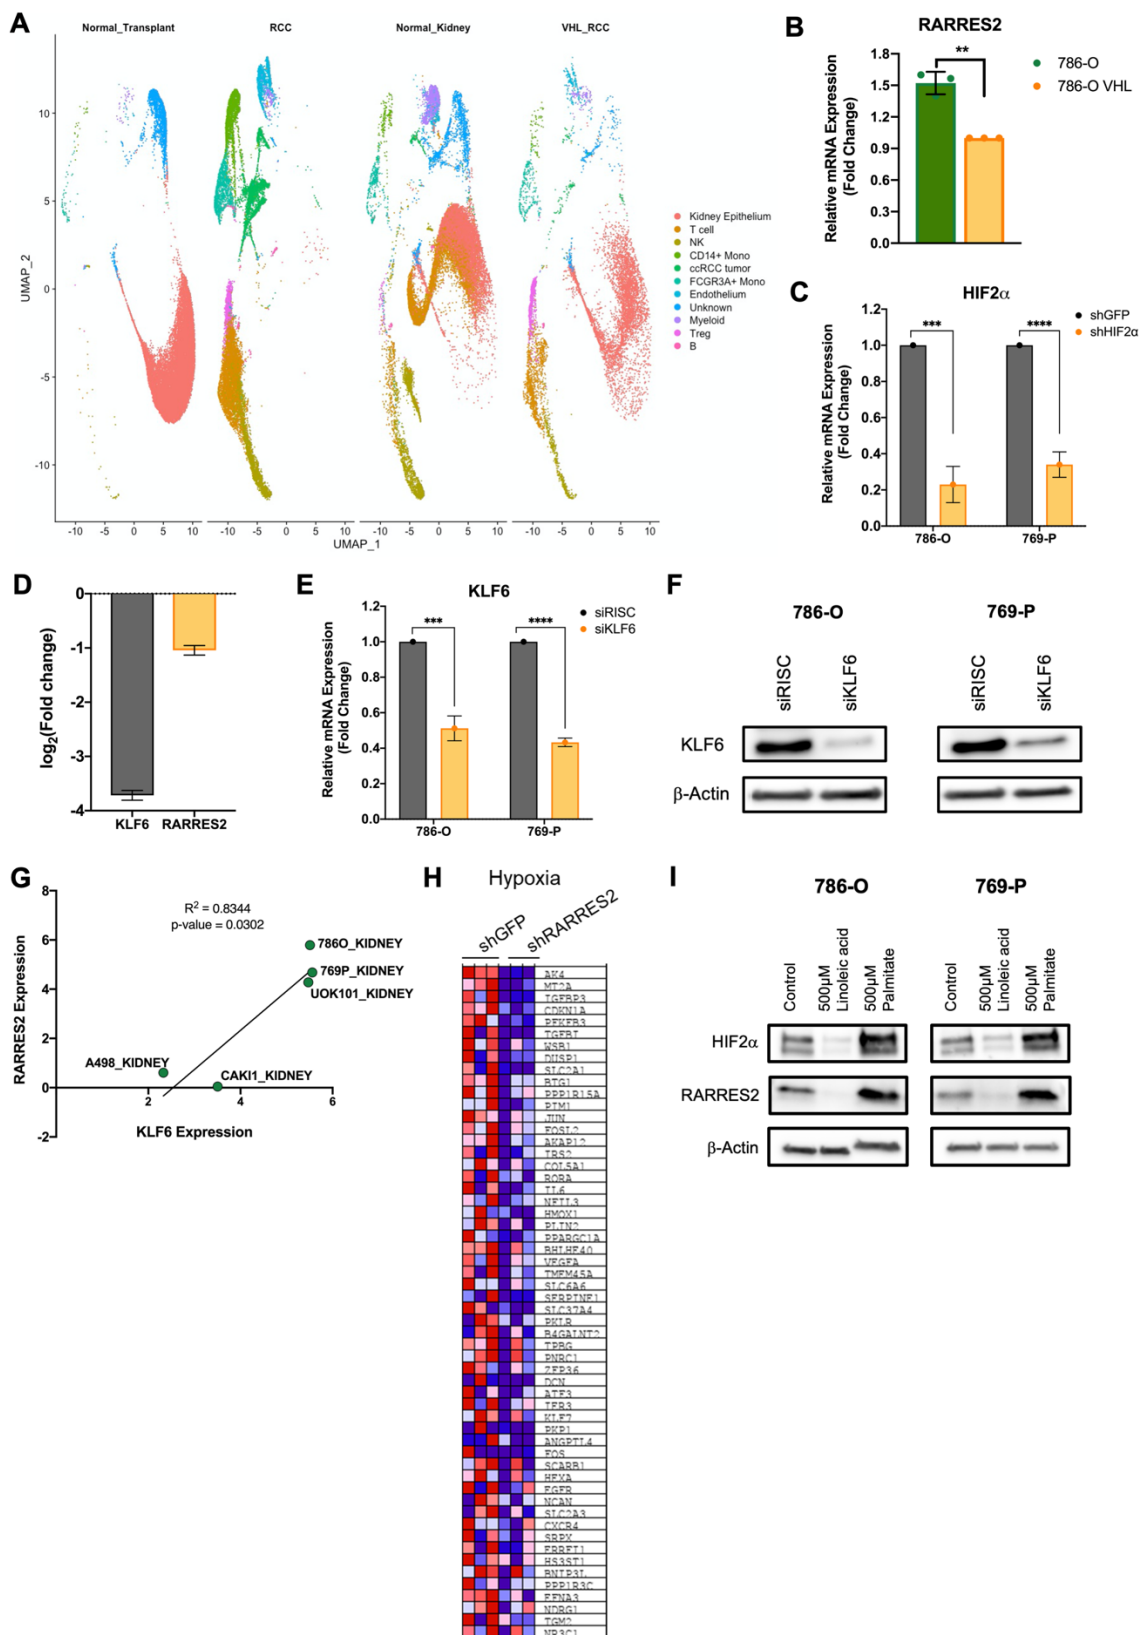

**Figure S8. Chemerin regulation by KLF6, Related to Figure 6.**

152 (A) Tumor clusters of human normal kidney, ccRCC specimens with wild-type VHL and  
153 ccRCC specimens with VHL mutation from scRNA-seq data, presented as UMAP plots.

154 (B) Relative mRNA expression of *RARRES2* in 786-O and 786-O VHL cells, measured by  
155 qRT-PCR. Two-tailed student's t-test.

156 (C) Relative mRNA expression of *HIF2 $\alpha$*  in 786-O and 769-P cells infected with shGFP control  
157 or shRNAs encoding lentivirus targeting *HIF2 $\alpha$* , confirming knockdown of *HIF2 $\alpha$*  in Fig.  
158 6C. Two-tailed student's t-test.

159 (D) Fold change of *RARRES2* mRNA expression in 786-O with KLF6 knockdown as  
160 compared to control, extracted from RNA-seq data (28).

161 (E) Relative mRNA expression of *KLF6* in 786-O and 769-P cells transfected with control  
162 siRISC or siRNA targeting KLF6 (siKLF6), confirming knockdown of KLF6 in Fig. 6D. Two-  
163 tailed student's t-test.

164 (F) Immunoblot of lysate confirming knockdown of KLF6 in 786-O and 769-P cells transfected  
165 with control siRISC or siKLF6 in Fig. 6D.

166 (G) Correlation of chemerin and KLF6 expression in multiple ccRCC cell lines interrogated  
167 from the Cancer Dependency Map database. The  $R^2$  value of the linear correlation is 0.83  
168 with p-value of 0.0302.

169 (H) Heatmap of downregulated hypoxia pathway genes in 786-O infected with lentivirus  
170 encoding either shGFP or sh*RARRES2*. Purple, low expression; red, high expression.

171 (I) Immunoblots of lysates of 786-O and 769-P cells treated with 500  $\mu$ M linoleic acid (a  
172 polyunsaturated fatty acid) or 500  $\mu$ M palmitate (a saturated fatty acid), showing  
173 decreased in *HIF2 $\alpha$*  and chemerin protein after incubation with 500  $\mu$ M linoleic acid but  
174 increased after incubation with 500  $\mu$ M palmitate.

175 Error bars represent SEM. \* $p < 0.05$ , \*\* $p < 0.01$ , \*\*\* $p < 0.001$ , \*\*\*\* $p < 0.0001$ .

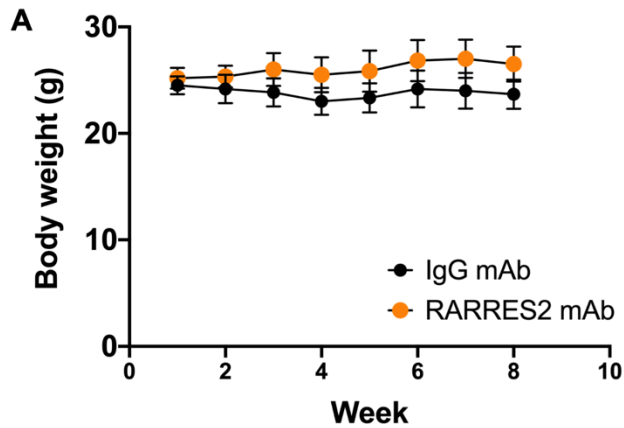

176

177 **Figure S9. Monoclonal antibody targeting chemerin shows no toxicity in mice, Related to**

178 **Figure 7.**

179 (A) The weight of mice receiving 20mg/kg of either mAb (n=6 each arm), after 786-O was  
 180 implanted orthotopically under the left kidney capsule of nude mice. Weight is recorded  
 181 weekly starting from the day of tumor implantation.

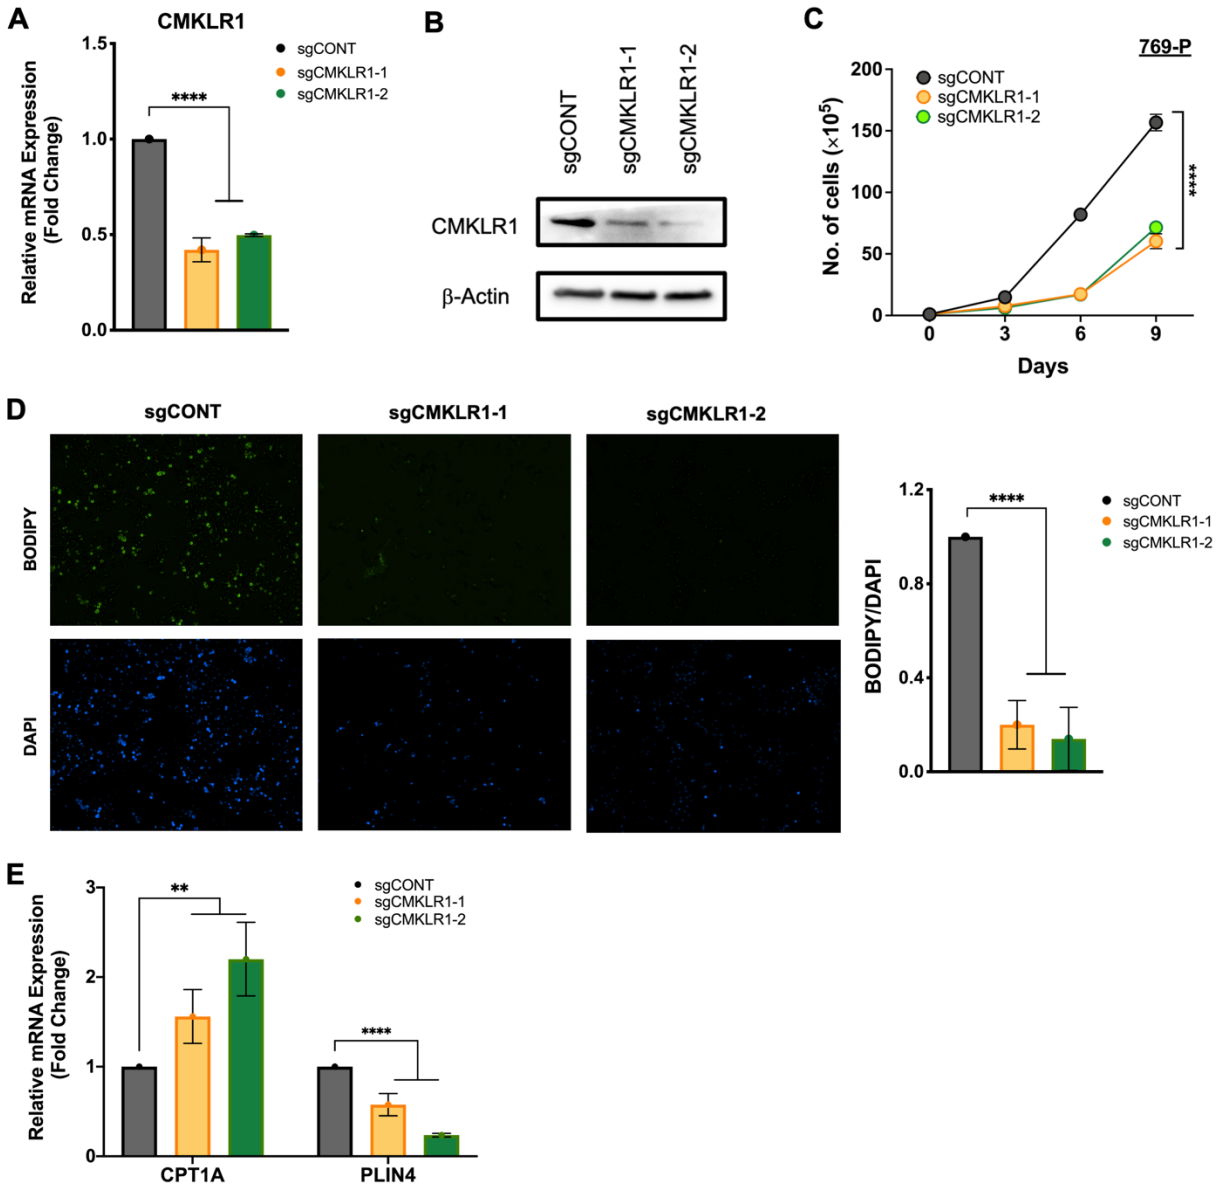

**Figure S10. CMKLR1 regulates cell growth and lipid metabolism in ccRCC cells.**

- (A) Relative mRNA expression of CMKLR1 in 769-P cell infected with lentivirus encoding either control sgCONT or sgCMKLR1 (sgCMKLR1-1 and sgCMKLR1-2). Two-way repeated measures ANOVA with Geisser-Greenhouse correction.
- (B) Immunoblot of lysate confirming knockdown of CMKLR1 protein from 769-P cells infected with sgCONT or sgCMKLR1 (sgCMKLR1-1 and sgCMKLR1-2).

189 (C) Cell proliferation assay of 769-P cells infected with lentivirus encoding either sgCONT or  
190 sgCMKLR1 (sgCMKLR1-1 and sgCMKLR1-2). Two-way repeated measures ANOVA with  
191 Geisser-Greenhouse correction.

192 (D) BODIPY staining of 769-P cells infected with either sgCONT or sgCMKLR1 (sgCMKLR1-  
193 1 and sgCMKLR1-2) (upper panel). DAPI staining of nucleus in lower panel (4×).  
194 Quantification of BODIPY staining, normalized to DAPI staining in 769-P cells infected  
195 with lentivirus encoding either sgCONT or sgCMKLR1 (sgCMKLR1-1 and sgCMKLR1-2).  
196 One-way ANOVA.

197 (E) Expression of CPT1A and PLIN4, as measured by qRT-PCR, in the 769-P cells infected  
198 with either sgCONT or sgCMKLR1 (sgCMKLR1-1 and sgCMKLR1-2). One-way ANOVA.

199 Error bars represent SD. \* $p < 0.05$ , \*\* $p < 0.01$ , \*\*\* $p < 0.001$ , \*\*\*\* $p < 0.0001$ .
